# Supplementary material for: Meiotic Behavior of Achiasmate Sex Chromosomes in the African Pygmy Mouse Mus mattheyi Offers New Insights into the Evolution of Sex Chromosome Pairing and Segregation in Mammals
Source: MDPI journal article supplement (doi:10.3390/genes12091434), 2021-09-17
Supplement: s1 [file s1]

Supplementary Figure S1

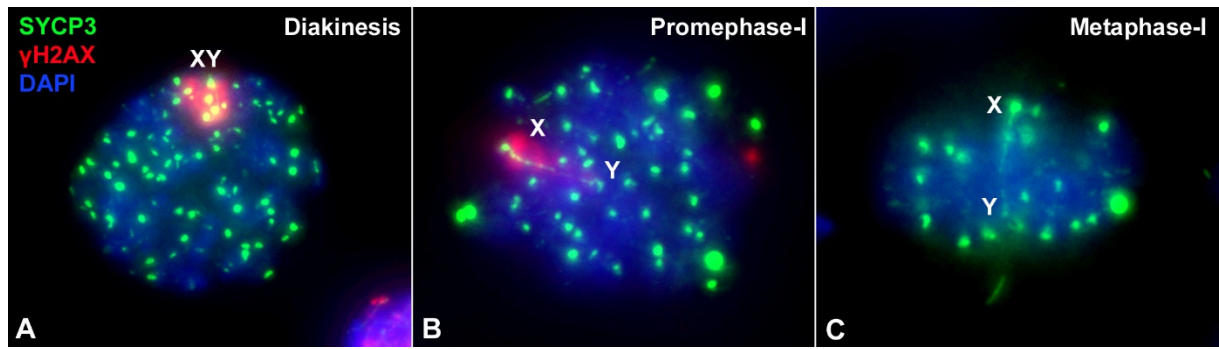

**Supplementary Figure S1.**  $\gamma$ H2AX labeling of sex chromosomes during first meiotic division in *M. musculus*. Squashed spermatocytes labelled with antibodies against SYCP3 (green) and  $\gamma$ H2AX (magenta) and counterstained with DAPI (blue). Sex chromosomes are labelled with  $\gamma$ H2AX in diakinesis (**A**), but only a weak labelling is conserved in prometaphase-I (**B**), and no  $\gamma$ H2AX is detected in metaphase-I (**C**). Scale bar: 10  $\mu$ m.
